# Supplementary material for: Vascular function of the T3/modern clade WUSCHEL-Related HOMEOBOX transcription factor genes predate apical meristem-maintenance function
Source: PubMed Central journal article supplement (PMC9036803; doi:10.1186/s12870-022-03590-0), 2022-04-25
Supplement: 12870_2022_3590_MOESM2_ESM.pdf [file 12870_2022_3590_MOESM2_ESM.pdf]

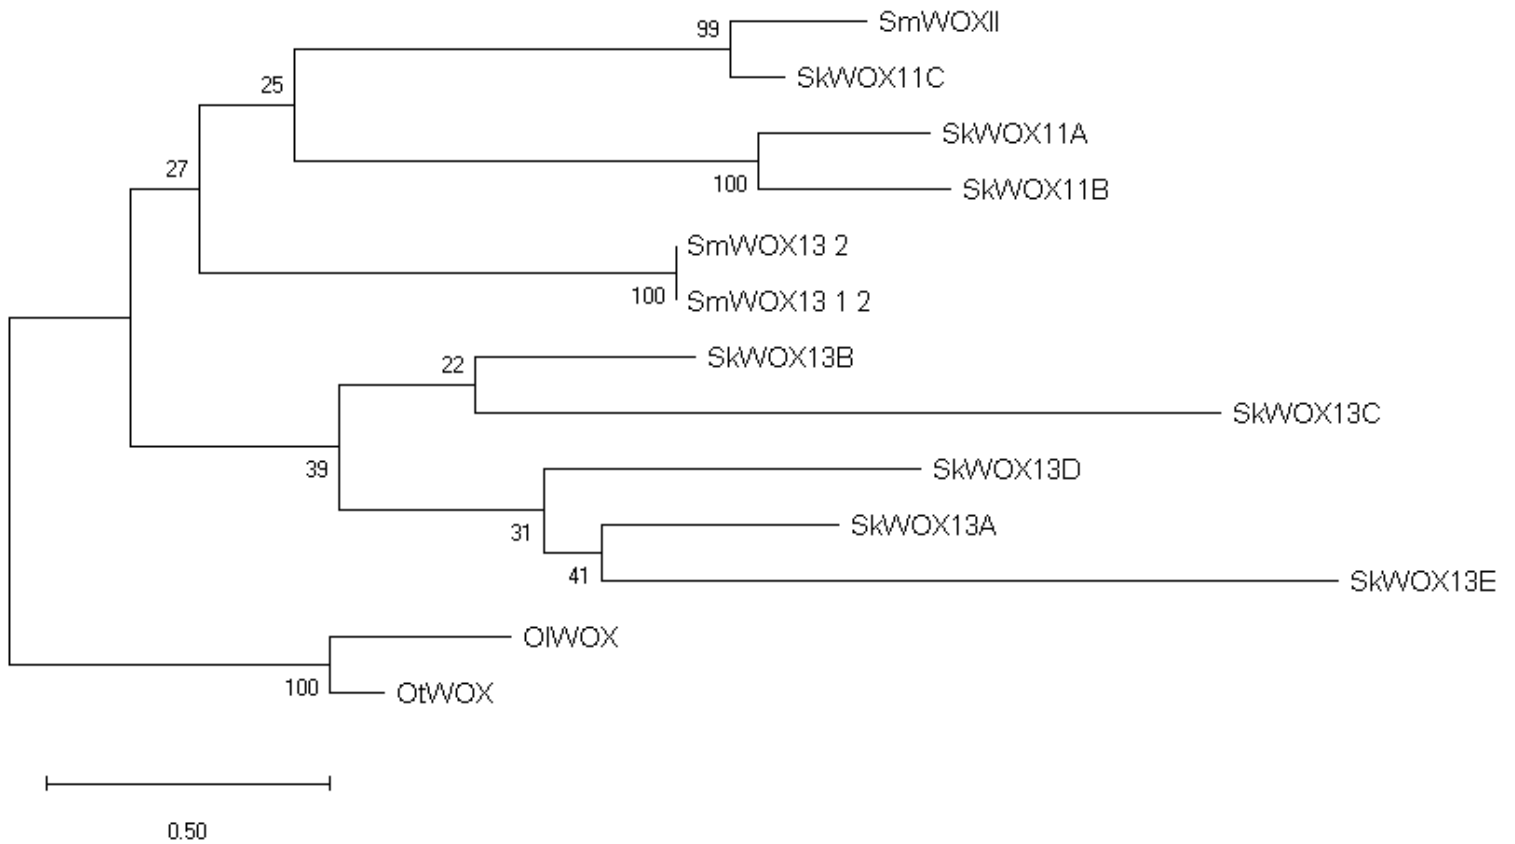

**Figure S1: Phylogeny of Selaginella WOX proteins.** Abbreviations *OI*, *Ostreococcus lucimarinus*; *Ot*, *Ostreococcus tauri*; *Sm*, *Selaginella moellendorffii*; *Sk*, *Selaginella kraussiana*. Relatedness was inferred using Maximum-likelihood and 500 bootstrap replicates. Alignment of sequences was conducted with M-coffee (53) and cladogram constructed with MEGA X (54). Numbers represent percentage of trees with same grouping.

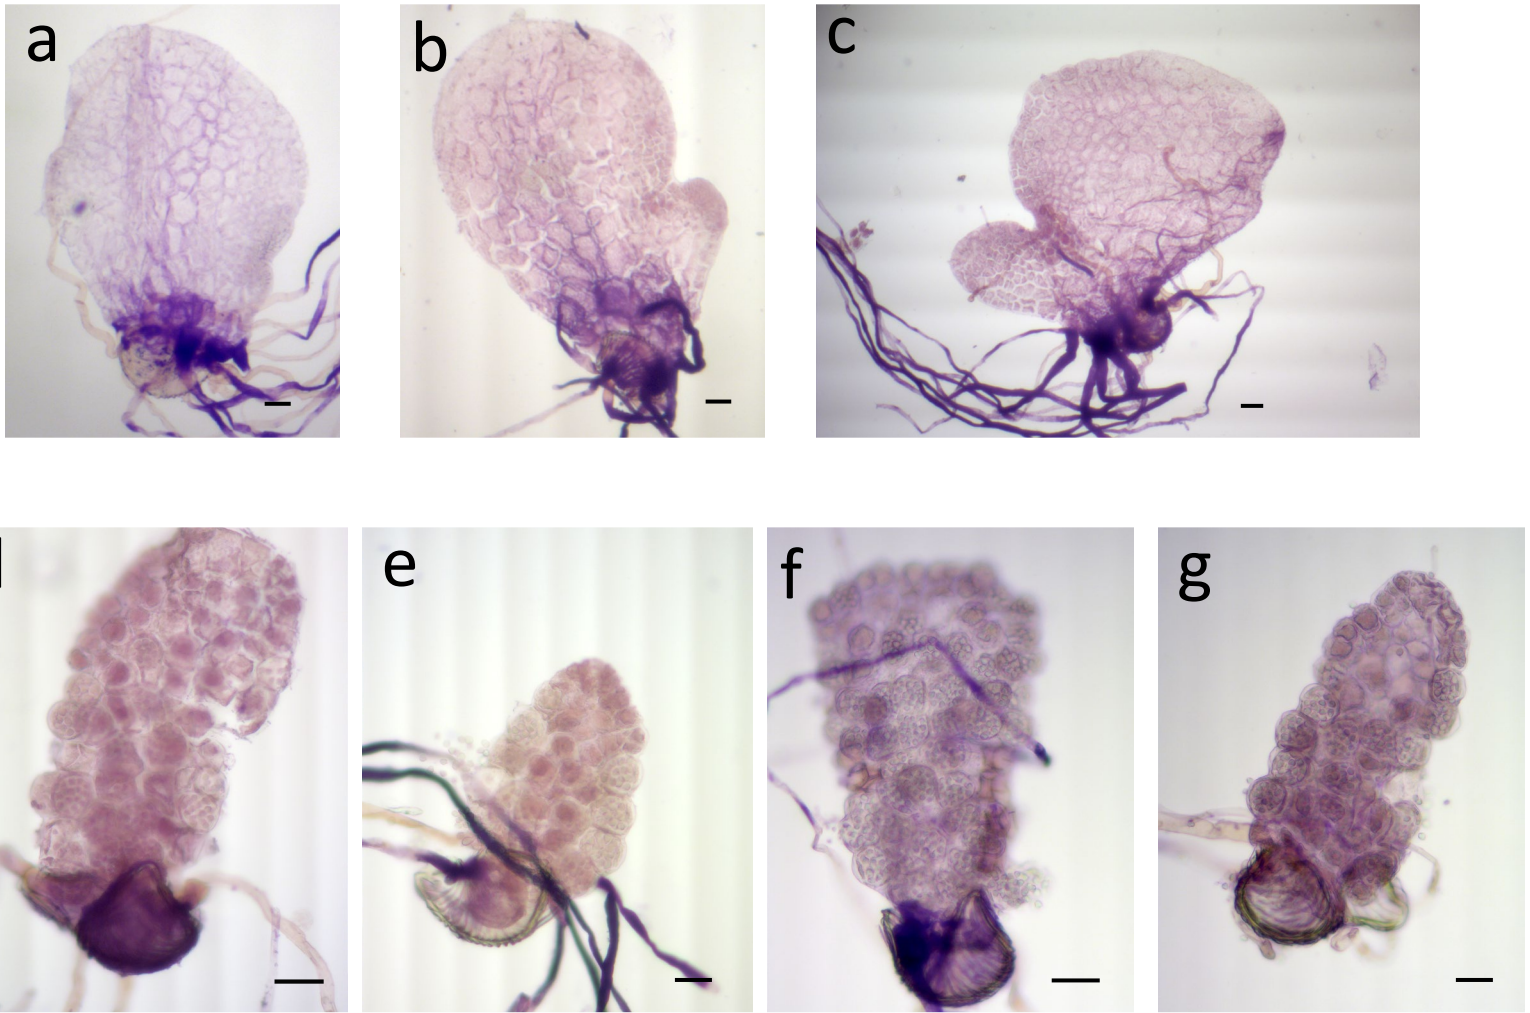

**Figure S2: Whole mount *in situ* hybridization of *CrWUL* in *C. richardii* gametophytes.** (a-c) Hermaphroditic gametophytes at 7-day (a), 9-day (b), and 13-day (c) old hybridized with sense probe. (d-g) Male gametophytes at 7-day (d, e) and 13-day (f,g) old hybridized with anti-sense (d, f) or sense probe (e, g). Scale bars = 0.05mm.

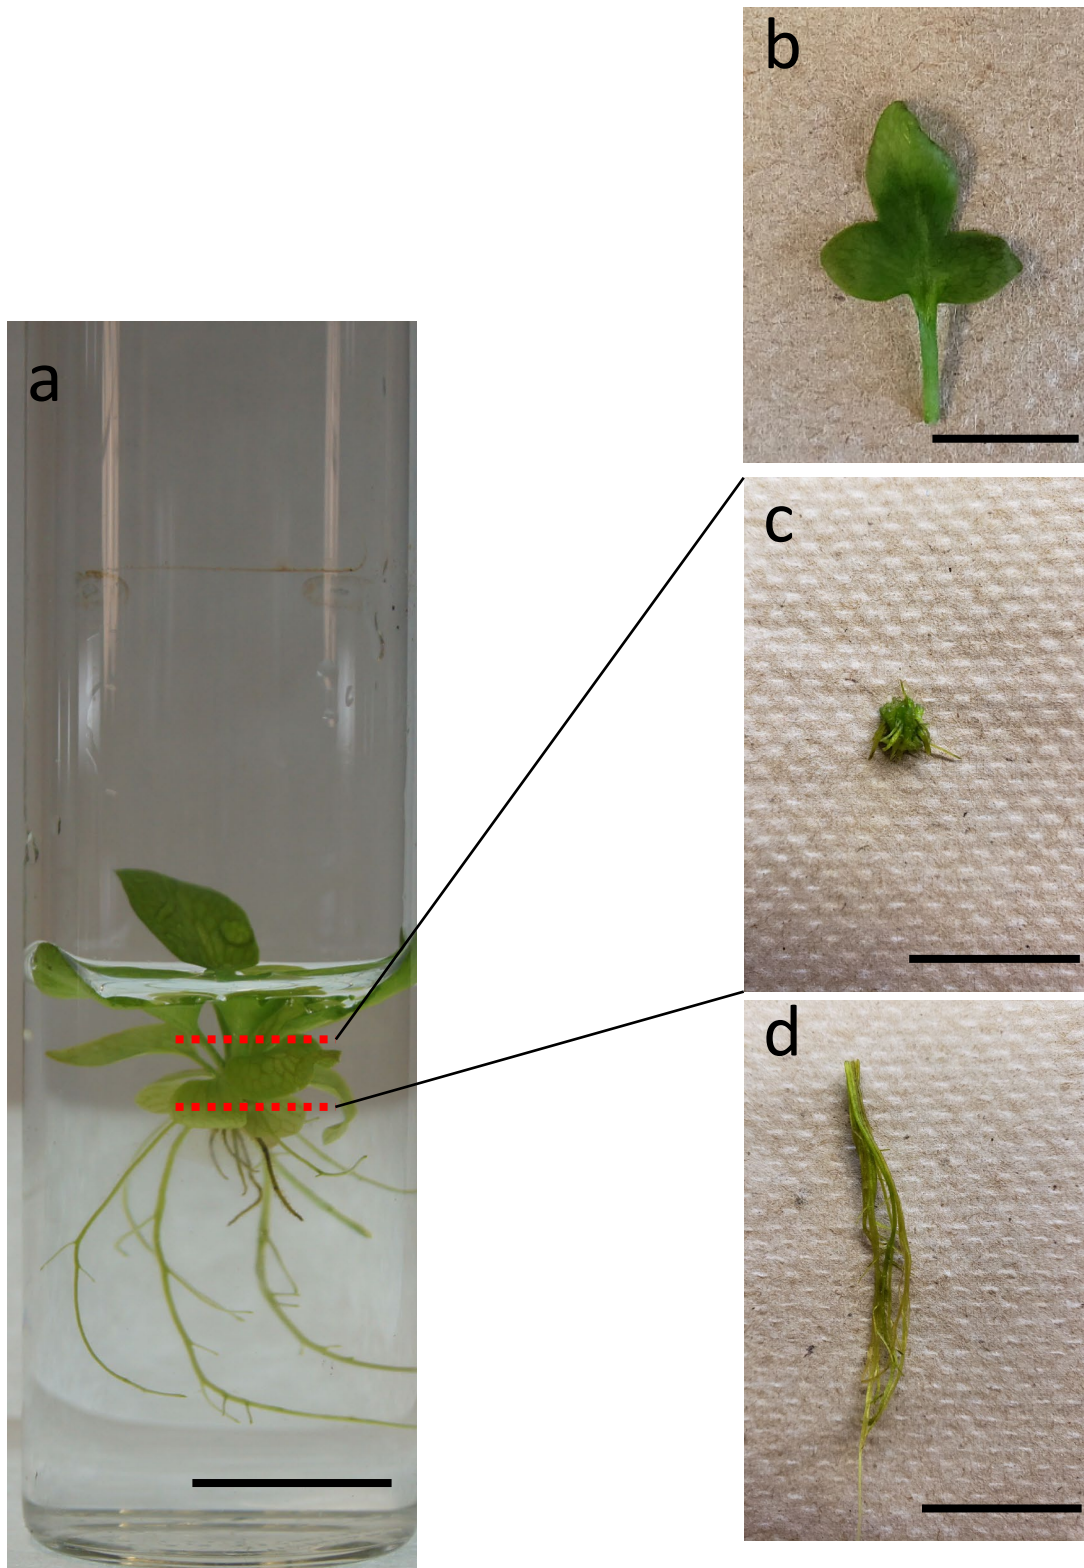

**Figure S3: Dissection diagram of *C. richardii* sporophytes tissues for RT-qPCR of *CrWUL*.** (a) Whole-sporophyte before dissection. (b) Single dissected leaf. (c) Shoot with leaves and roots removed. (d) Roots. Red dotted lines denote plane of dissection. Scale bars = 20 $\mu$ m

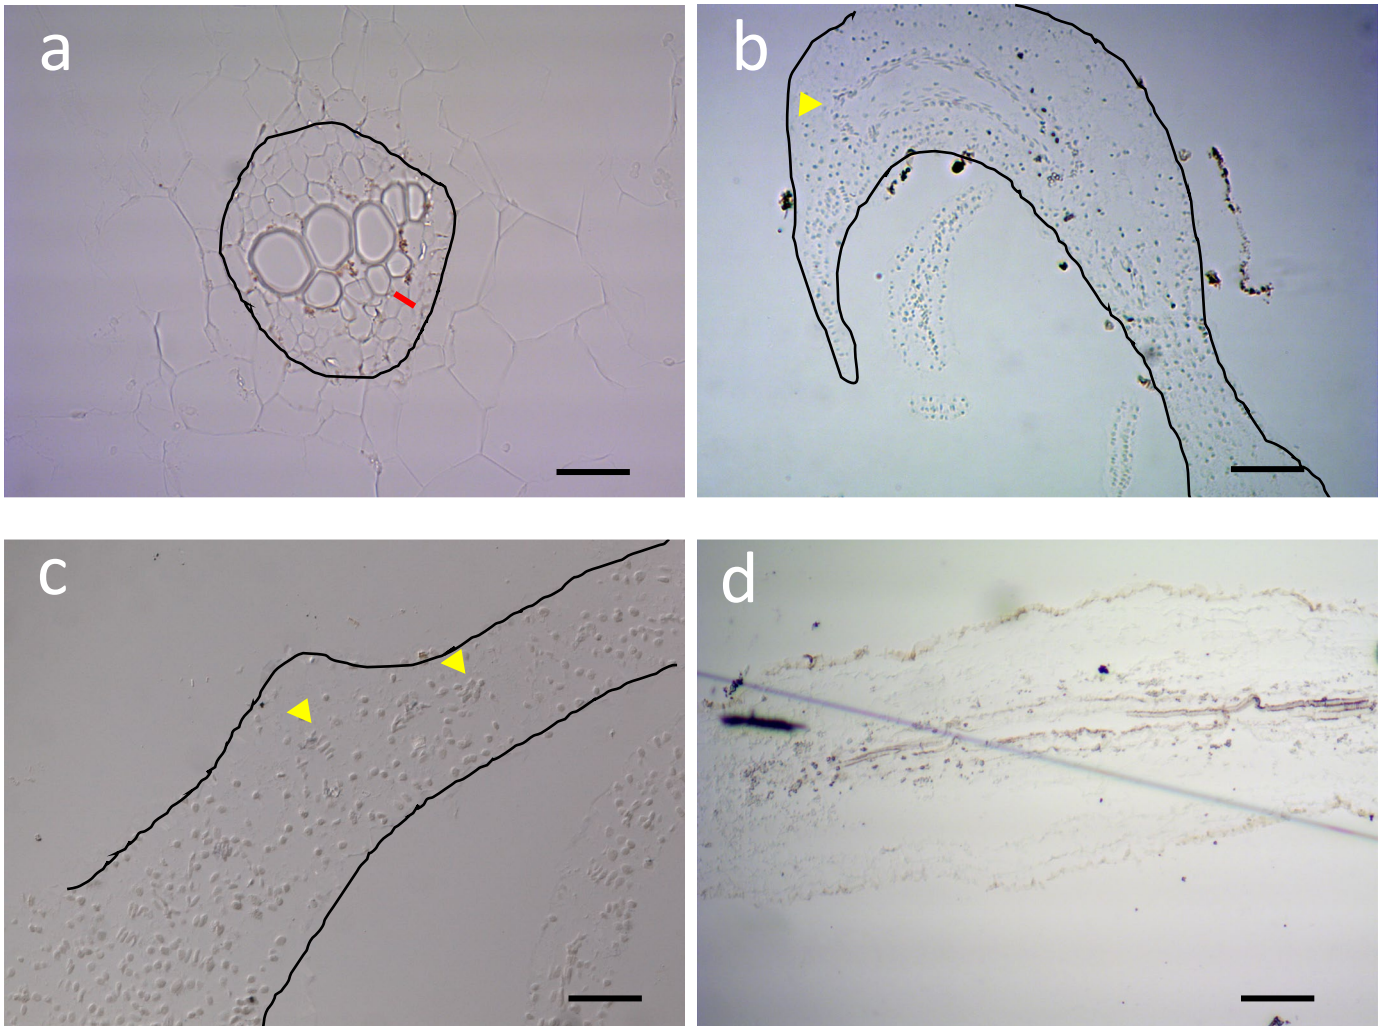

**Figure S4: *In situ* hybridization of *CrWUL* sense probes in *C. richardii* sporophyte tissues.** (a,b) Vascular bundles of the vegetative leaf petiole; cross-section (a), longitudinal section (b). (c) Vegetative leaf blade. (d) Root. Yellow arrowheads denote vascular bundles. Red bar signifies phloem. Scale bars = 20 $\mu$ m (a, c), 200 $\mu$ m (b, d).

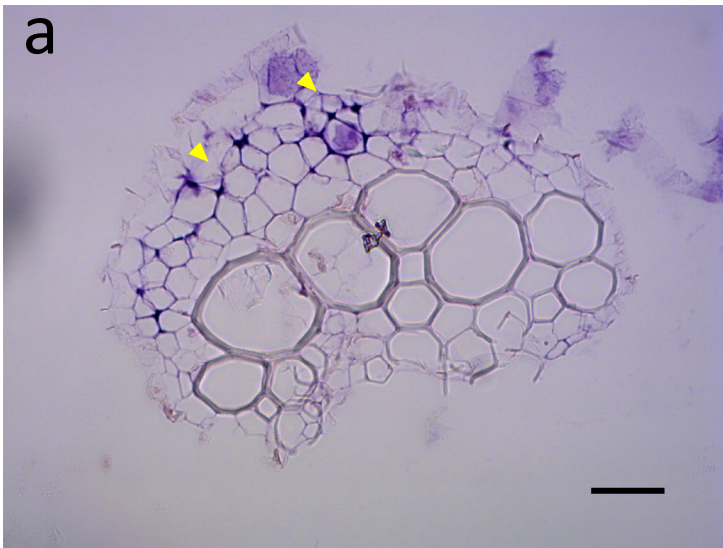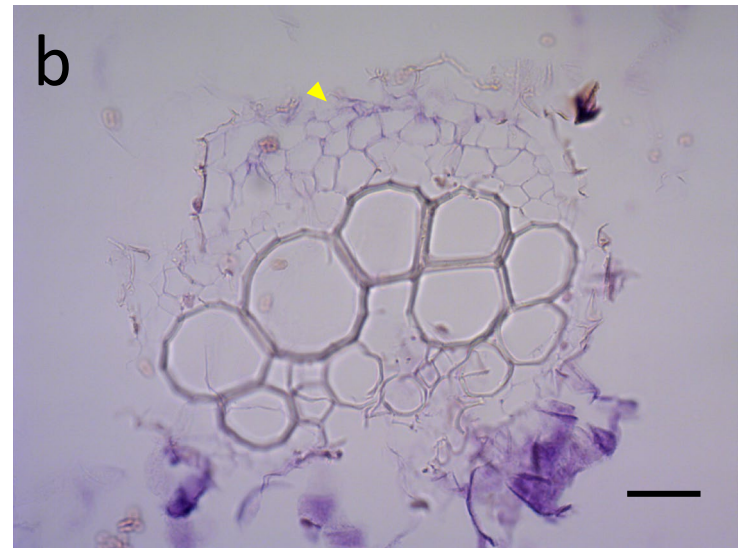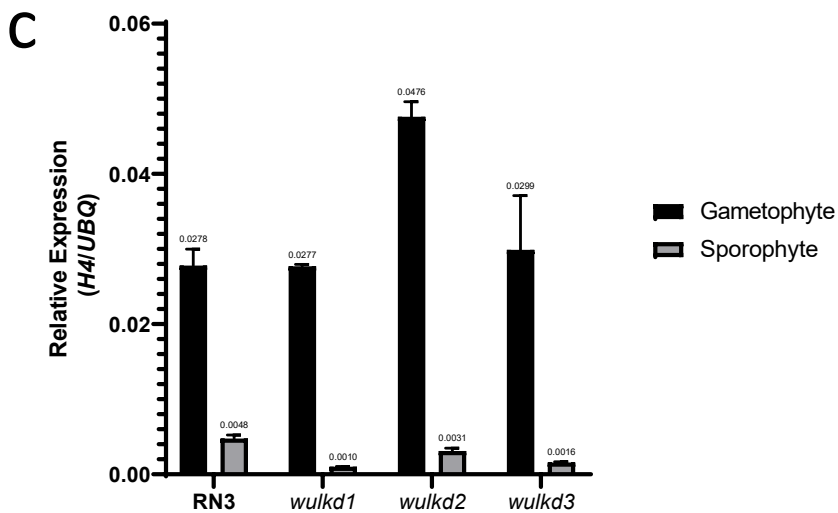

**Figure S5: Expression of *CrH4* in vascular bundles and *crwul* knockdown lines.** (a,b) *In situ* hybridization of *CrH4* in vascular bundles; antisense probe (a), sense probe (b). (c) Relative expression of *CrH4* in p7-8 sporophyte and 14 dpp gametophyte tissues of wild-type and *crwul* knockdown lines. Yellow arrows point to phloem. Scale bars = 20 $\mu$ m.

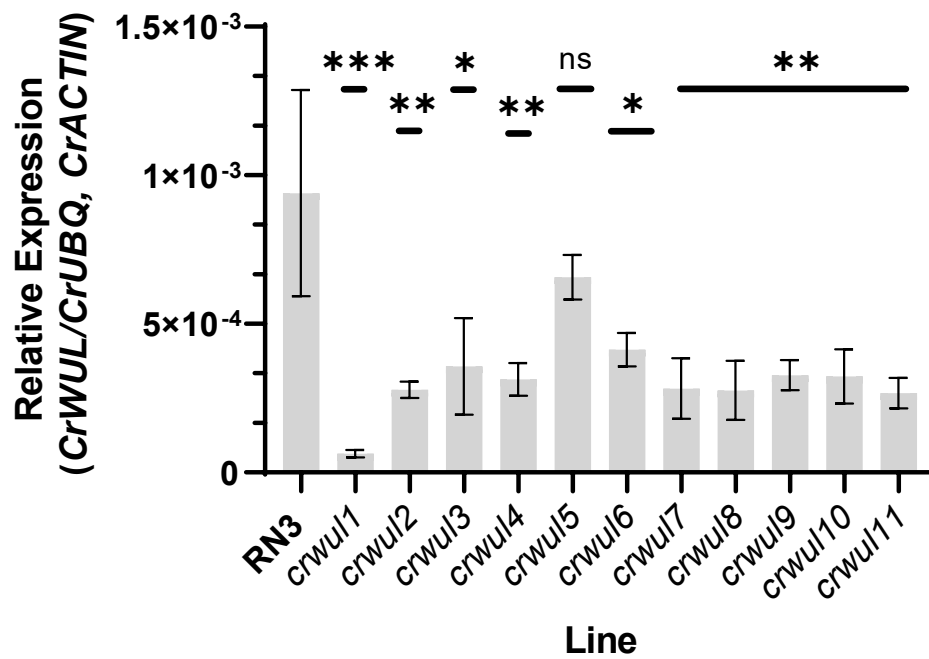

**Figure S6: Expression of *CrWUL* in *crwul* RNAi knockdown lines.**

*CrWUL* expression measured relative to *CrUBQ* and *CrACTIN* (mean ± SEM; ns, not significant; \*,  $P \leq 0.05$ ; \*\*,  $P \leq 0.01$ ; \*\*\*,  $P \leq 0.001$   $N \geq 3$ ).

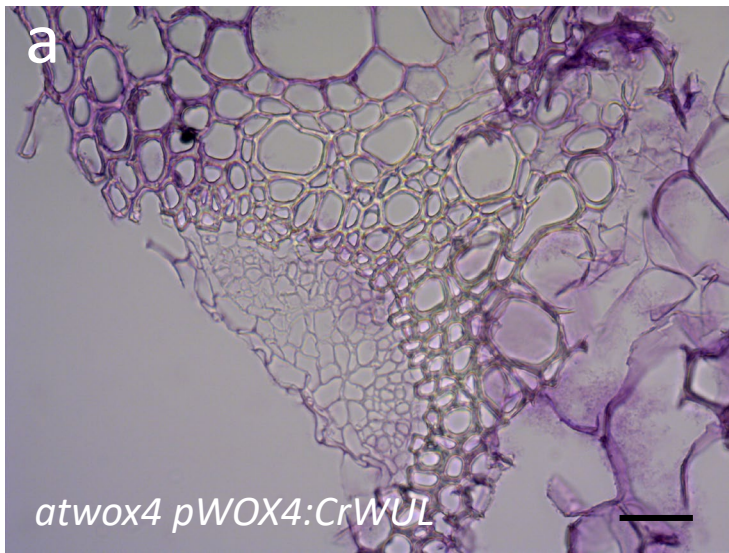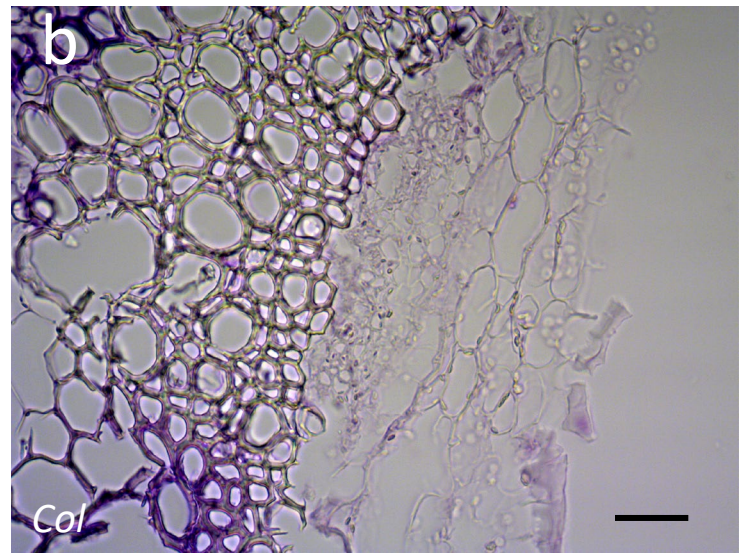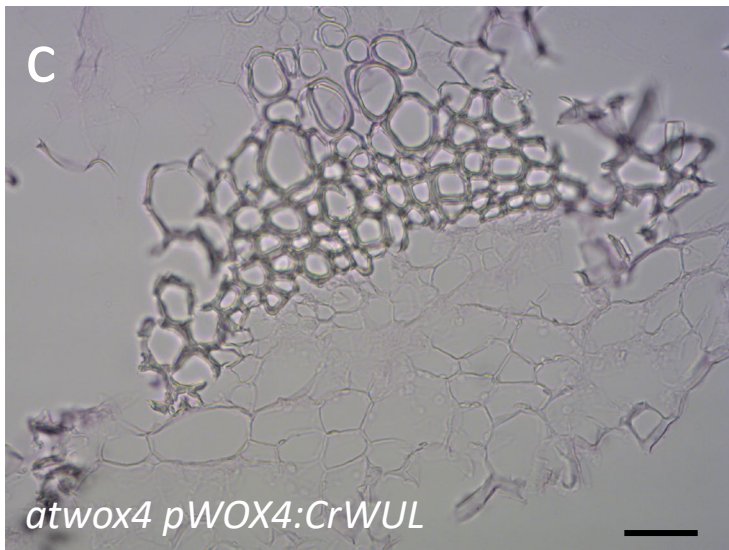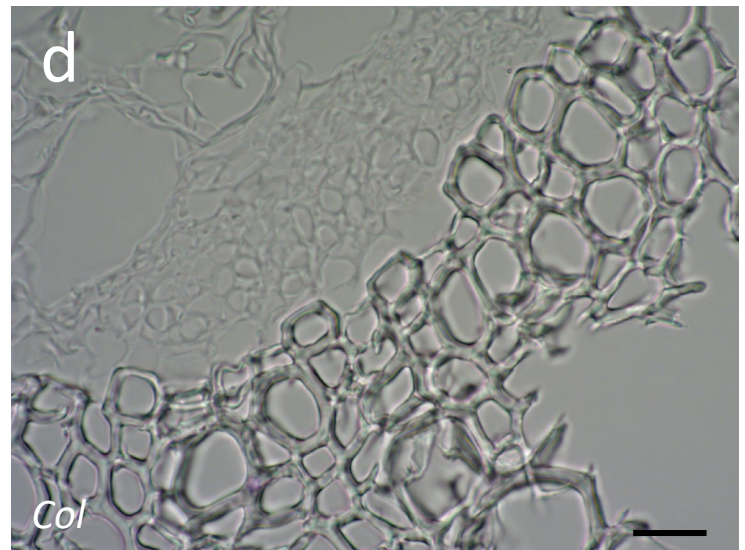

**Figure S7: Expression of *CrWUL* and *AtWOX4* in vascular bundles of complemented *atwox4* null mutants and *Col* plants. (a) *CrWUL* anti-sense probe. (b) *AtWOX4* anti-sense probe. (c) *CrWUL* sense probe. (d) *AtWOX4* sense probe. Scale bars = 20 $\mu$ m.**
