# Supplementary material for: Vascular function of the T3/modern clade WUSCHEL-Related HOMEOBOX transcription factor genes predate apical meristem-maintenance function
Source: PubMed Central journal article supplement (PMC9036803; doi:10.1186/s12870-022-03590-0), 2022-04-25
Supplement: 12870_2022_3590_MOESM4_ESM.pdf [file 12870_2022_3590_MOESM4_ESM.pdf]

**Supplemental Table S1.** Primer sequences used in the study.

| Gene                      | Sequence                                        | Use                                          |
|---------------------------|-------------------------------------------------|----------------------------------------------|
| <i>CrWUL</i>              | F-cacc*cactcgccaatctcaagcat                     | Insert for RNAi region 1                     |
|                           | R-ctaaccggttctgtgcgataaagg                      |                                              |
|                           | F-cacc*tcagctgaaccgtgatgtag                     | Insert for RNAi region 2                     |
|                           | R-cttgagattggcgagtgtttg                         |                                              |
|                           | F-atgagagaatatgtgcggggatc                       | RT-qPCR                                      |
|                           | R-attgtagccgtacagagaccac                        |                                              |
|                           | F-cactcgccaatctcaagcat                          | <i>In situ</i> probes anti-sense             |
|                           | R-taatacgactcactataggg*ctaaccggttctgtgcgataaagg |                                              |
|                           | F-taatacgactcactataggg*atgagagaatatgtgcggggatc  | <i>In situ</i> probes sense                  |
|                           | R-attgtagccgtacagagaccac                        |                                              |
|                           | F-cacc*atgagagaatatgtgcggggatc                  | Whole mount <i>in situ</i> probes anti-sense |
|                           | R-taatacgactcactataggg*attgtagccgtacagagaccac   |                                              |
|                           | F-taatacgactcactataggg*cgaaggagaacatggtaatg     | Whole mount <i>in situ</i> probes sense      |
|                           | R-cttgagattggcgagtgtttg                         |                                              |
|                           | F-cacc*atgagagaatatgtgcggggatc                  | Full-length for <i>atwox4</i> rescue         |
| R-aggagaacgctaactttcagttc |                                                 |                                              |

**Supplemental Table S1.** Primer sequences used in the study.

|                   |                                                 |                                                      |
|-------------------|-------------------------------------------------|------------------------------------------------------|
| <i>AtWOX4</i>     | F-cacc*cgagaaaggcatgcatagcatt                   | <i>In situ</i> probes anti-sense                     |
|                   | R-taatacgactcactataggg*tcatgacttcatctcccttcagga |                                                      |
|                   | F-taatacgactcactataggg*cgagaaaggcatgcatagcatt   | <i>In situ</i> probes sense                          |
|                   | R-tcatgacttcatctcccttcagga                      |                                                      |
|                   | F-nnnaagctt*ggcaagttagtgaggagg                  | Promoter cloning for <i>atwox4</i> rescue            |
|                   | R-nnnttaattaa*tgctatatgttaaactagcaaagtctatg     |                                                      |
| <i>CrUBQ</i>      | F-gatggccgtactcttcagac                          | Expression analysis RT-qPCR                          |
|                   | R-ggagacgaagcagagatga                           |                                                      |
| <i>CrHistone4</i> | F-taatacgactcactataggg*atgtctggaaggggaaaaggag   | <i>In situ</i> probes                                |
|                   | R-taatacgactcactataggg*tcagccgccgaagccatagag    |                                                      |
| Hygromycin        | F-aggtctacccccctttcaacg                         | Genotyping                                           |
|                   | R-aatgtgtgggttcagttggag                         |                                                      |
| Gabi-Kat          | F-aggtctacccccctttcaacg                         | Genotyping <i>atwox4</i> null mutants (Primer Set 1) |
|                   | R-aatgtgtgggttcagttggag                         |                                                      |
|                   | F-gcaatgagtatgatggccaatg                        | Left border of pAC161 (Primer Set 2)                 |
|                   | R-gggctacactgaattgtagctc                        |                                                      |
|                   | F-atattgaccatcatactcattgc                       |                                                      |

**Supplemental Table S1.** Primer sequences used in the study.

|                 |                                               |                                  |
|-----------------|-----------------------------------------------|----------------------------------|
|                 | R-aatgtgtgggttcagttggag                       | o8409 and Set 1 R (primer set 3) |
| <i>SkWOX11c</i> | F-taatacgactcactataggg*atggaggcgccaggcac      | <i>In situ</i> probes            |
|                 | R-taatacgactcactataggg*tcaggctgcactcccgc      |                                  |
| <i>SkWOX11b</i> | F-taatacgactcactataggg*atgctgccgtgccaagaaagtc | <i>In situ</i> probes            |
|                 | R-taatacgactcactataggg*ttactgctgcagctgctgctg  |                                  |

Sequences left of \* are added for directional cloning or T7 promoter sequence. All sequences are 5' to 3'

Table S2: Statistics for gametophyte cell counts

| Dunnett's multiple comparisons test | Predicted (LS) mean diff. | 95.00% CI of diff. | Below threshold? | Summary | Adjusted P Value |
|-------------------------------------|---------------------------|--------------------|------------------|---------|------------------|
| 7                                   |                           |                    |                  |         |                  |
| RN3 vs. crwul1                      | -22.69                    | -107.6 to 62.22    | No               | ns      | 0.8719           |
| RN3 vs. crwul3                      | -118.9                    | -215.7 to -22.06   | Yes              | *       | 0.011            |
| RN3 vs. crwul2                      | -21.22                    | -118.0 to 75.59    | No               | ns      | 0.9233           |
| 10                                  |                           |                    |                  |         |                  |
| RN3 vs. crwul1                      | -96.31                    | -204.1 to 11.50    | No               | ns      | 0.091            |
| RN3 vs. crwul3                      | -275.4                    | -376.2 to -174.7   | Yes              | ****    | <0.0001          |
| RN3 vs. crwul2                      | -163.2                    | -268.6 to -57.77   | Yes              | ***     | 0.0009           |
| 14                                  |                           |                    |                  |         |                  |
| RN3 vs. crwul1                      | -343.3                    | -436.1 to -250.4   | Yes              | ****    | <0.0001          |
| RN3 vs. crwul3                      | -266.1                    | -362.5 to -169.6   | Yes              | ****    | <0.0001          |
| RN3 vs. crwul2                      | -46.01                    | -134.3 to 42.29    | No               | ns      | 0.4749           |
